# Supplementary material
Source: Springer Nature journal article supplement (https://www.springermedizin.de/resource/supplementary/12883_2006_27_MOESM6_ESM.pdf/9456952)

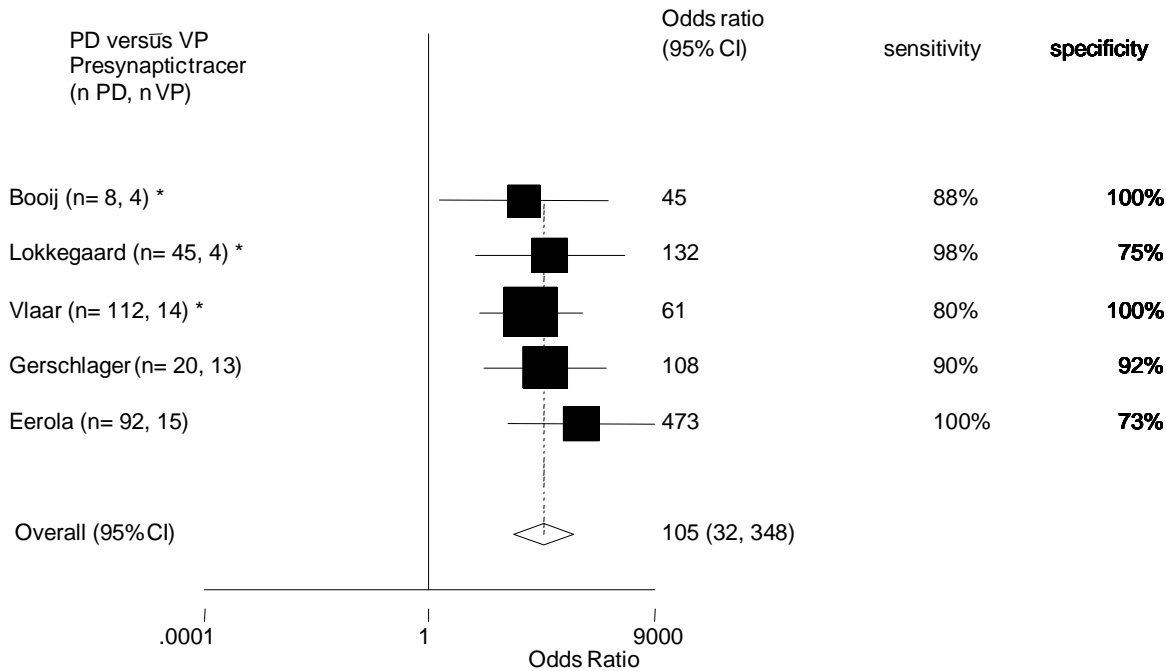

Heterogeneity (I-squared) = 0.00

Supplement: MOESM6 [file 9456952]
